# 1 **Species level resolution of female bladder microbiota from marker gene** 2 **surveys**

3 Carter Hoffman, MS<sup>1</sup>; Nazema Y Siddiqui, MD, MHSc<sup>2</sup>; Ian Fields, MD<sup>3</sup>; W. Thomas Gregory,  
4 MD<sup>3</sup>; Holly Simon, PhD<sup>4</sup>; Michael A. Mooney, PhD<sup>1</sup>; Alan J. Wolfe, PhD<sup>5</sup>; Lisa Karstens,  
5 PhD<sup>1,3\*</sup>  
6

## 7 **Abstract**

8 The human bladder contains bacteria in the absence of infection. Interest in studying these  
9 bacteria and their association with bladder conditions is increasing, but the chosen experimental  
10 method can limit the resolution of the taxonomy that can be assigned to the bacteria found in the  
11 bladder. 16S rRNA gene sequencing is commonly used to identify bacteria, but is typically  
12 restricted to genus-level identification. Our primary aim was to determine if accurate species-  
13 level identification of bladder bacteria is possible using 16S rRNA gene sequencing. We  
14 evaluated the ability of different classification schemes, each consisting of combinations of a 16S  
15 rRNA gene variable region, a reference database, and a taxonomic classification algorithm to  
16 correctly classify bladder bacteria. We show that species-level identification is possible, and that  
17 the reference database chosen is the most important component, followed by the 16S variable  
18 region sequenced.  
19

## 20 **Importance**

21 Species-level information may deepen our understanding of associations between bladder  
22 microbiota and bladder conditions, such as lower urinary tract symptoms and urinary tract  
23 infections. The capability to identify bacterial species depends on large databases of sequences,  
24 algorithms that leverage statistics and available computer hardware, and knowledge of bacterial  
25 genetics and classification. Taken together, this is a daunting body of knowledge to become  
26 familiar with before the simple question of bacterial identity can be answered. Our results show  
27 the choice of taxonomic database and variable region of the 16S rRNA gene sequence makes  
28 species level identification possible. We also show this improvement can be achieved through  
29 the more careful application of existing methods and use of existing resources.  
30

31  
32 Author Affiliations:

- 33 1. Department of Medical Informatics and Clinical Epidemiology, Oregon Health &  
34 Science University, Portland, OR USA
- 35 2. Department of Obstetrics and Gynecology, Duke University, Durham, NC USA
- 36 3. Department of Obstetrics and Gynecology Oregon Health & Science University,  
37 Portland, OR USA
- 38 4. AnimalBiome, Oakland, CA USA
- 39 5. Department of Microbiology & Immunology, Loyola University Chicago, Maywood, IL,  
40 USA

41 \*Corresponding author: karstens@ohsu.edu

## 42 Introduction

43 The human body provides a wide range of habitats, supporting a variety of microorganisms that  
44 include bacteria, archaea, viruses and fungi, collectively known as the human microbiome(1).  
45 Recent evidence from sequence-based and enhanced culturing techniques have revealed a  
46 population of microbes (bacteria, fungi and viruses) that exist in the bladder, even in the absence  
47 of infection(2–7). The discovery of the bladder microbiota (also known as the bladder urobiome)  
48 has led researchers to question how these microbes influence the health of the host. Studies have  
49 shown that altered bladder urobiome diversity is associated with urgency urinary incontinence  
50 (UUI)(4,8), urinary tract infection after instrumentation of the urinary tract(9,10), and is  
51 predictive of response to a common UUI drug (11). These studies collectively provide evidence  
52 that the bladder urobiome, while previously overlooked, is clinically relevant and warrants  
53 further investigation.

54 To study the relationships between the bacteria found in the human bladder and health of the  
55 host, it is necessary to accurately identify bacteria in a rapid and large-scale manner. Reliable  
56 methods of determining the bacterial identity of an unknown bacterium include Matrix Assisted  
57 Laser Desorption/Ionization-time of flight (MALDI-TOF) analysis or whole genome sequencing  
58 (WGS) of purified colonies; both techniques permit species-level identification of bacteria(12).  
59 However, culturing specific bacterial species is also time consuming and laborious. This  
60 limitation has been circumvented by adopting culture-independent methods of sequencing DNA  
61 directly from an environmental sample, such as shotgun metagenomic sequencing and targeted  
62 amplicon sequencing, the latter most commonly involving the 16S rRNA gene(13). These  
63 culture-independent sequencing methods are an attractive strategy because they can more  
64 accurately reveal microbiota diversity by identifying bacteria that are difficult to grow in culture.

65 Targeted amplicon sequencing is currently the most practical method for identifying bladder  
66 bacteria in a large-scale manner. When performing targeted amplicon sequencing, DNA is first  
67 extracted from all cells in a sample, including host and bacterial cells. Next, the polymerase  
68 chain reaction (PCR) is used to amplify a small segment of the bacterial genome. This segment is  
69 then sequenced in a high-throughput manner. Finally, bioinformatics are used to process the  
70 resulting sequences and identify the taxonomy of the bacteria. Algorithms compare the short  
71 DNA sequences recovered from a sample to known sequences held in a reference database until  
72 the closest match is found. In general, longer or more unique strings of sequenced DNA can be  
73 used to identify bacteria at a higher level of precision, though sequence length is often limited by  
74 the sequencing technology. The 16S rRNA gene is commonly used in amplicon sequencing  
75 studies due to its universal presence in bacteria. The 16S rRNA gene conveniently contains  
76 multiple “variable regions” with unique strings of sequence that can be used for bacterial  
77 identification. A common target is the 4<sup>th</sup> variable region (V4), as this region has good  
78 phylogenetic resolution down to the genus level for many bacteria(14).

79 When identifying bacteria using targeted amplicon sequencing there are three important  
80 components (**Figure 1**). These components are: 1) the identifier, or DNA sequence of the  
81 unknown bacterium; 2) a database of DNA sequences annotated with taxonomic information;  
82 and 3) a classifier, which is the algorithm that compares the unknown sequence to those in a  
83 database until the closest match is found. These components work together as a *classification*  
84 *scheme*. One common classification scheme uses the V4 region from the 16S rRNA gene

85 sequence(15) as the identifier, the Silva database(16), and the Naïve Bayes algorithm(17). A  
86 limitation of this particular classification scheme, and many others commonly used, is that the  
87 phylogenetic resolution is usually constrained to the genus level. Recently, several new  
88 approaches to sequence processing and taxonomy assignment have become available, which may  
89 improve resolution to the species level (e.g. amplicon sequence variant algorithms such as  
90 DADA2(18), and taxonomic classifiers such as Bayesian Lowest Common Ancestor  
91 (BLCA)(19)).

92 Our primary aim was to determine if species-level identification of bladder bacteria is possible  
93 from 16S rRNA gene sequencing studies. To achieve this aim, we used a representative sample  
94 of bacteria found in the human female bladder and published by Thomas-White and  
95 colleagues(20). This dataset includes bacteria found in the human female bladder that have been  
96 cultured, isolated, subjected to whole genome sequencing, and identified using full length  
97 sequences of 40 protein-encoding genes.. We used these known DNA sequences to determine  
98 which classification schemes would be most useful for future targeted amplicon sequencing  
99 studies. We evaluated several variable regions (i.e. potential identifiers), reference databases, and  
100 taxonomic classification algorithms for their ability to accurately identify bladder bacteria at the  
101 species level.

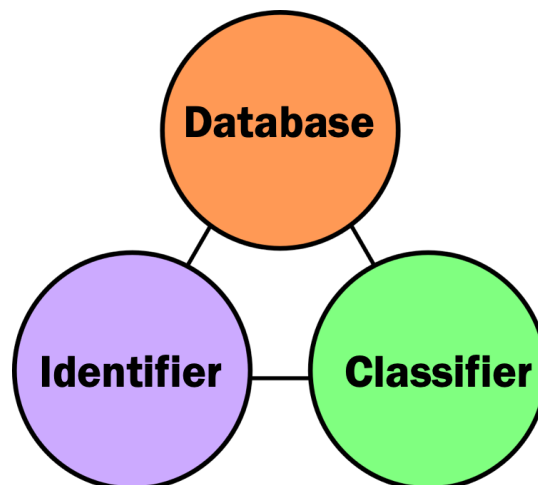

102

103 **Figure 1. Model of the components that make up a classification scheme to assign taxonomy to**  
104 **unknown sequences.** A classification scheme consists of an identifier, a database, and a classifier. The identifiers  
105 used in this study are subsequences of the 16S rRNA gene, computationally generated using published primers as  
106 coordinates on the gene sequence. These targeted amplicons are the V3, V4, and V6 variable regions of the gene, or  
107 span the V1-V3, V2-V3, V3-V4, and V4-V6 variable regions. The databases used in this study are the Greengenes,  
108 Silva, and NCBI 16S. The classifiers used in this study are the Naive Bayes and Bayesian Lowest Common Ancestor  
109 (BLCA) algorithms. One example of a classification scheme is the V4 region identifier, Silva database, and Naive  
110 Bayes classifier. Another example classification scheme is the V6 region identifier, Greengenes database, and BLCA  
111 classifier. These two examples are distinct from each other and can have different outcomes when assigning  
112 taxonomy.

## 113 Results

114 **Representation of bladder bacteria in 16S rRNA gene sequence databases.** The Thomas-  
115 White genome sequencing dataset consists of 149 bladder bacterial isolates, representing 78  
116 bacterial species from 36 genera(20). There are several databases available for bacterial  
117 identification using the 16S rRNA gene(21,22). Of these, Greengenes (v.13\_5)(23), Silva (v.

118 132)(24), and NCBI 16S Microbial (v. August 2019) were evaluated due to their widespread use  
119 in amplicon sequencing studies and availability of species-level annotation. At the genus level,  
120 all but 1 genus (*Globicatella*) were present in the Greengenes database and all genera were  
121 present in the Silva and NCBI 16S Microbial databases. At the species level, all 78 bladder  
122 bacterial species were present in the Silva and NCBI 16S Microbial databases, whereas only 21  
123 species were present in the Greengenes database.

124 **Information contained in variable regions differs for bladder bacterial species.** Sequencing  
125 studies frequently focus on a small segment of the 16S rRNA gene that can be rapidly sequenced  
126 in a high throughput manner using short read sequencing technology, such as the Illumina HiSeq  
127 or MiSeq. To evaluate the performance of different variable regions as identifiers, amplicons  
128 were computationally generated from the Thomas-White genome sequencing dataset for the V1-  
129 V3, V2-V3, V3-V4, V4-V6, V3, V4, and V6 variable regions using published primers (see  
130 **Methods**). These computational amplicons (**Figure 2A**) were used to determine how well the  
131 currently available classification schemes can distinguish bladder bacterial species. To assess  
132 different classification schemes, we tested multiple permutations of the variable regions listed  
133 above with different databases (i.e. Greengenes, Silva, or NCBI 16S Microbial) and different  
134 classifiers (i.e. Naive Bayes or BLCA, see **Figure 1**).

135 To quantify the amount of information contained across variable regions of the 16S rRNA gene  
136 among commonly identified bladder bacteria, we performed a sliding window analysis on a  
137 multiple sequence alignment (MSA) of all genomes from the Thomas-White dataset. We  
138 calculated entropy as a measure of information content along the MSA (**Figure 2B**). As  
139 expected, the defined variable regions contained regions of high entropy, suggesting variability  
140 across species, whereas variable regions were flanked by conserved regions with low entropy  
141 containing sequences that are similar among species. The V1 and V2 regions contained the  
142 highest entropy, while V7 and V8 contained the lowest.

143 **Evaluation of classification scheme performance.** To evaluate the ability of  
144 currently available resources to identify bladder species, we calculated the recall, precision and  
145 F-measure for each classification scheme implemented (see **Methods**). Briefly, each resulting  
146 taxonomic classification was evaluated as a true match, true non-match, false match or false non-  
147 match based on whether the taxonomic classification was correctly assigned or not. Recall refers  
148 to the proportion of matches that the classification scheme correctly identified out of all possible  
149 matches. Precision refers to the proportion of matches that the classification scheme called  
150 correctly out of all classified matches. The F-measure is the equally weighted harmonic mean of  
151 recall and precision.

152 In general, the classification schemes that use the NCBI 16S Microbial database perform the best  
153 (**Figure 3**), with high recall and precision (range 60.3%-91.0% for both classifiers). Those using  
154 the Silva database show reduced precision and recall (range 23.1%-70.5% for both measures).  
155 Because the Greengenes database is missing many of the bacterial species found in the bladder, it  
156 is less precise. As such, classification schemes using the Greengenes database can have good  
157 recall values (range 50.0%-81.8%), but the precision values are very low (range 22.0%-36.0%),  
158 indicating a large proportion of false matches to the number of true matches.

159

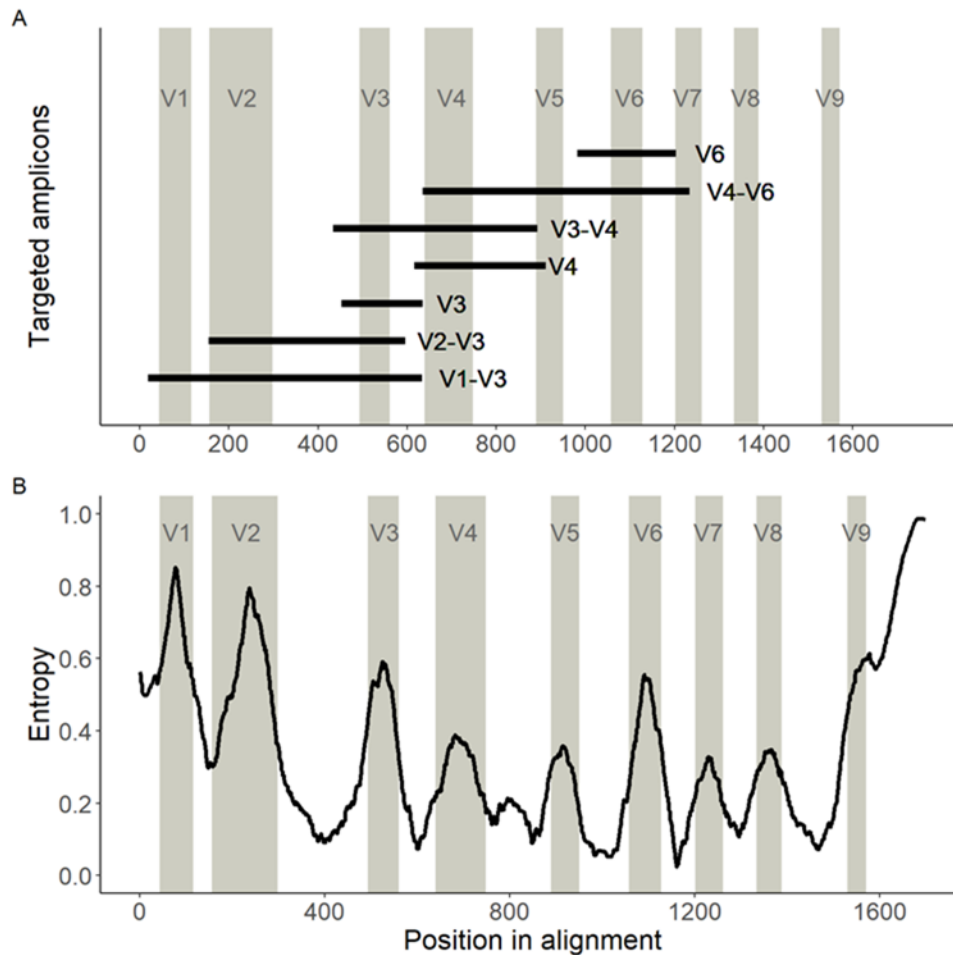

**Figure 2. Variable regions of the 16S rRNA gene used in this study.** A) Locations of the primers used in this study on the 16S rRNA gene. Locations of the predicted amplicons are shown as black bars in relation to the multi-sequence alignment (MSA) of the bacterial species described in Thomas-White et al. (2018). Gray columns are the locations of the known variable regions based on the sequence from *E. coli*. B) The information of variable regions, measured by entropy from a sliding window analysis of the MSA. Higher entropy indicates that the region has more variability across species, and therefore more information to identify a bacterial species. Lower entropy indicates that the region has little variability (i.e. is conserved) across species and therefore less information to identify a bacterial species.

160 When different variable regions are used as identifiers with Silva and NCBI 16S databases, there  
161 are differences in classification scheme outcomes. Using the Silva database and Naive Bayes  
162 classifier, the identifiers yielding the highest recall are the large V3-V4 (69.2%) and V4-V6  
163 (69.2%) targeted amplicons. Using the Silva database and BLCA classifier, the V1-V3 and V4-  
164 V6 amplicons have the highest recall (55.1% and 48.7%, respectively). In contrast, the identifiers  
165 yielding the highest recall in classification schemes using the NCBI 16S database are the V1-V3  
166 (90.3% on average) and V2-V3 (89.1% on average) targeted amplicons, regardless of the  
167 classifier.

168

169

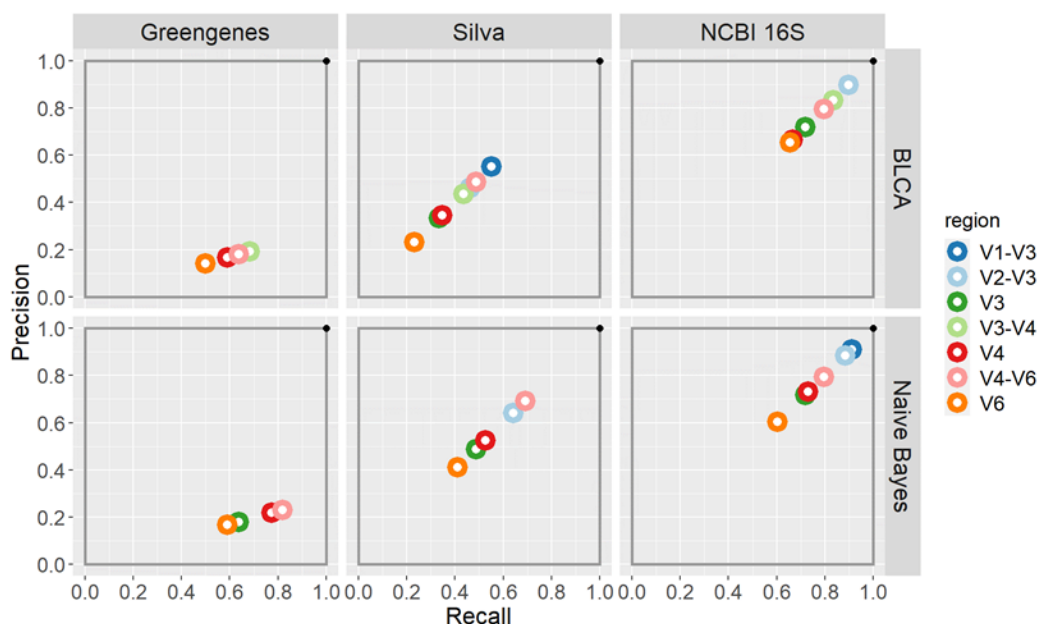

**Figure 3: Classification scheme evaluation when ignoring confidence scores.** The performance of each classification scheme is summarized by the precision (y axis) and recall (x axis) for each variable region (color). The best classification scheme would lie in the upper right-hand corner. Overall, classification schemes using the NCBI 16S Microbial database performed better than those using the Greengenes or Silva databases.

## 170 Confidence scores affect classification.

171 The BLCA and Naïve Bayes classifiers used in this study will classify an unknown sequence  
172 even when the posterior probability for that taxon is very low. To account for this situation, a  
173 confidence score is calculated that measures how much the classification changes through  
174 random permutation (bootstrapping) and produces a value that reflects the “goodness of fit” of  
175 that classification. When lacking any knowledge of how to choose the best confidence score that  
176 minimizes the number of errors of a classification scheme (i.e. when a test set is not available),  
177 using a predefined confidence score threshold is an option. Here, we evaluated the performance  
178 of classification schemes when confidence score thresholds of 50% or 80% were used, such that  
179 matches returned with confidence scores less than the threshold were considered non-matches.  
180 **Figure 4** shows the effect of increasing the confidence score on the number of true matches  
181 returned by each classification scheme.

182 Almost all classification schemes had a decrease in recall when using a default confidence score  
183 of 80% (**Supplemental Figure 1**). This effect is especially marked for the classification schemes  
184 that use the Silva database, which shows a 79.3% reduction in recall, on average. Classification  
185 schemes that use the NCBI 16S database are unequally affected, for example the V1-V3  
186 identifier shows a slight reduction in recall (7.1% on average), while the V6 identifier shows the  
187 largest (43.3% on average). Classification schemes that use the Greengenes database are slightly  
188 affected. These reductions in recall are mirrored in all classification schemes when a confidence  
189 score of 50% is used as a threshold, but at a smaller magnitude.



190 Changes in the precision of the classification schemes are affected the most by the database used  
191 (**Supplemental Figure 1**). For the classification schemes that use the NCBI 16S database,  
192 precision is generally improved regardless of confidence score, but at unequal amounts. For  
193 example, using the 80% threshold, the V1-V3 identifier shows a slight increase of 3.5% on  
194 average, while the V6 identifier shows a large 39.7% increase on average. Classification schemes  
195 that use the Silva database are unequally affected, with both reduction and gains in precision. A  
196 dramatic increase in precision is shown by the classification scheme composed of the Silva  
197 database, V4 identifier, and the Naive Bayes classifier. When ignoring a confidence score, this  
198 classification scheme has a precision of 52.6%, but shows a 63.1% gain when using a confidence  
199 score of 80% as a threshold. In general, precision is reduced when using the BLCA classifier and  
200 the Silva database. As with recall, classification schemes that use the Greengenes database show  
201 slight changes in precision.

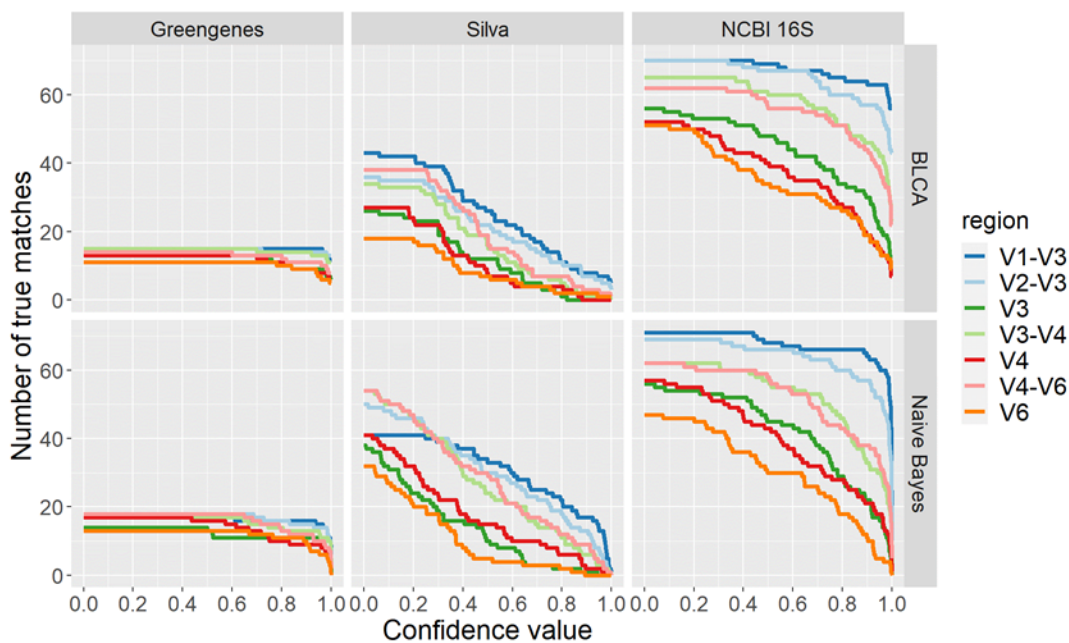

**Figure 4: The number of true matches returned for each classification scheme across all confidence score values.** As the confidence score value is increased, the number of true matches dramatically decreases, especially for schemes using the Silva database.

202 The overall changes in how these classification schemes perform when using a 50% or 80%  
203 confidence score can be summarized by comparing the F-measure values shown in  
204 **Supplemental Figure 2**. In almost every classification scheme, the F-measure value decreases  
205 when a threshold is used, indicating a larger proportion of false matches and false non-matches  
206 to the number of true matches. The classification schemes that use the Silva database clearly  
207 demonstrate this effect, which show a 66.9% reduction in F-measure values on average. The  
208 classification schemes that use the NCBI 16S database show slight decreases in the F-measure  
209 values, with the exceptions of those that use the V3, V4 and V6 regions as identifiers. Those  
210 classification schemes show a large 27.2% reduction in F-measure values on average. Finally,  
211 the classification schemes that use the Greengenes database have slight changes in their F-  
212 measure values, regardless of using a threshold or not.

213 **Amplicons spanning more than one variable region identify a higher number of bladder**  
214 **bacterial species.** Amplicons spanning more than one variable region identified more unique  
215 bladder bacteria at the species level than amplicons spanning a single variable region. For  
216 example, with the commonly used V4 variable region and Naïve Bayes classifier, 21.8% of  
217 bladder bacteria are correctly identified with the Greengenes database, whereas 52.6% are  
218 identified with the Silva database and 73.1% with the NCBI 16S database (**Figure 5**). However,  
219 with the NCBI database, when using amplicons spanning more than one variable region, such as  
220 the V1-V3 region, 91.0% of bacteria are correctly identified at the species level.

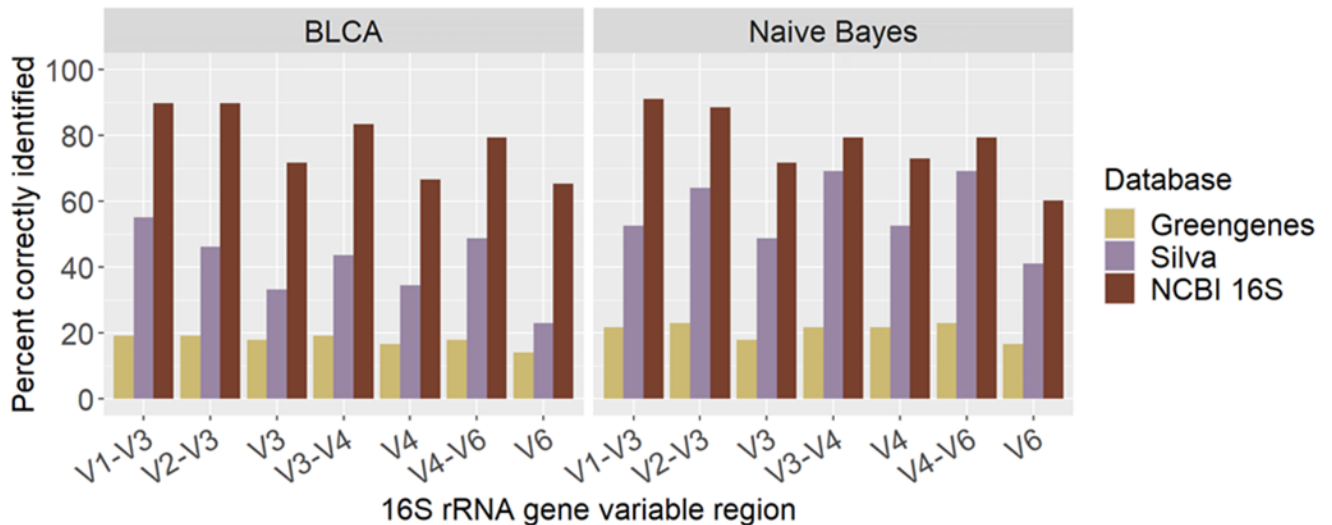

**Figure 5: Percent of bladder bacteria correctly identified for each classification scheme.** With the commonly used V4 variable region and BLCA classifier, 17% of bladder bacteria are correctly identified using the Greengenes database, compared with 35% correctly identified using the Silva database and 67% using the NCBI 16S database. A similar trend is seen with the Naïve Bayes classifier. Using other variable regions can lead to improved species-level resolution to a maximum number of 91% correctly identified.

221 **Species identified depends on choice of database and variable region.** While the results thus  
222 far have focused on summarizing overall performance of classification schemes for identifying  
223 bladder bacteria at the species level, we also sought to determine which classification schemes  
224 could be used to identify specific bacteria (**Table 1, Supplemental Figure 3**). Although the  
225 NCBI database contains the largest representation of bladder species, some species were not  
226 identified with certain variable regions, if at all. For example, *Lactobacillus* species were overall  
227 best represented within the NCBI database, with 8 out of 9 species being identified with the V1-  
228 V3 and V2-V3 variable regions (**Figure 6**). However, the other variable regions only identified  
229 between 4 and 6 *Lactobacillus* species when using the NCBI database. Interestingly,  
230 *Lactobacillus crispatus* was identifiable with the Silva and NCBI databases when using the V4-  
231 V6 regions, but only with the NCBI database using the V1-V3 and V2-V3 regions, and only the  
232 Silva database when using the V4 and V6 regions independently. *Lactobacillus iners* was not  
233 correctly identified from our dataset with any classification scheme.

234 Additionally, we found that there were important discrepancies for bacteria that are thought to  
235 play a role in bladder health and disease (**Supplemental Figure 3**). Several bladder species, such  
236 as *Gardnerella vaginalis*, were only detected with the NCBI and Silva databases. *Staphylococcus*



237 species were poorly identified with the V4 region but were distinguishable with all other regions.  
238 *Streptococcus* and *Corynebacterium* species were best identified with NCBI. *Escherichia coli* is  
239 not well represented in any of the databases, and was only detected with the V4 region and the  
240 NCBI database.

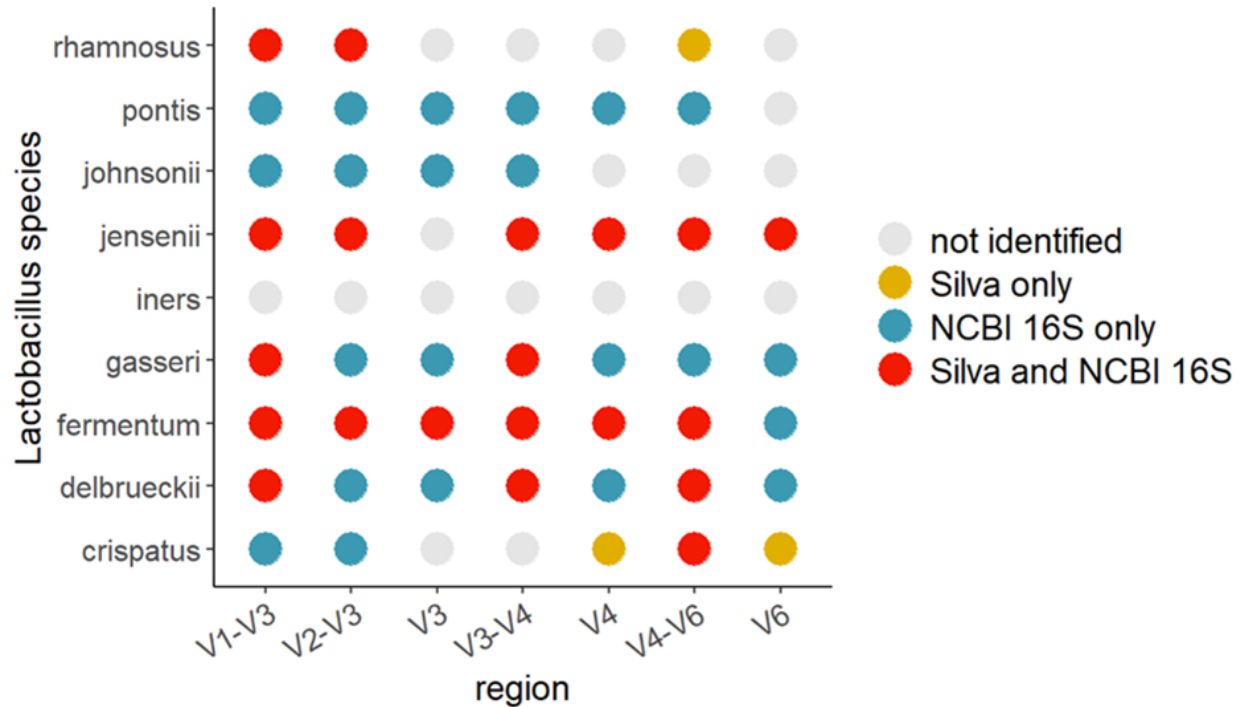

**Figure 6: The ability of classification schemes to distinguish between different Lactobacillus species.** Results shown for classification schemes using the BLCA classifier. Classification schemes using the NCBI 16S database have the most coverage, regardless of variable region chosen. The Greengenes database is not shown since it only classified two species (*L. pontis* and *L. delbrueckii*).

241

242 **Table 1.** Number of species identified with each database by variable region (BLCA).

| Genus                  | V1-V3 | V2-V3 | V3 | V3-V4 | V4 | V4-V6 | V6 |
|------------------------|-------|-------|----|-------|----|-------|----|
| <b>Actinomyces</b>     |       |       |    |       |    |       |    |
| NCBI 16S               | 3     | 3     | 3  | 3     | 2  | 3     | 3  |
| Silva                  | 3     | 4     | 1  | 1     | 1  | 1     | 1  |
| Greengenes             | 0     | 0     | 0  | 0     | 0  | 0     | 0  |
| <b>Aerococcus</b>      |       |       |    |       |    |       |    |
| NCBI 16S               | 3     | 3     | 3  | 3     | 3  | 3     | 3  |
| Silva                  | 3     | 3     | 3  | 3     | 3  | 3     | 0  |
| Greengenes             | 0     | 0     | 0  | 0     | 0  | 0     | 0  |
| <b>Bifidobacterium</b> |       |       |    |       |    |       |    |
| NCBI 16S               | 3     | 3     | 3  | 3     | 2  | 2     | 2  |
| Silva                  | 3     | 2     | 2  | 2     | 2  | 1     | 1  |
| Greengenes             | 3     | 3     | 3  | 3     | 2  | 2     | 2  |
| <b>Corynebacterium</b> |       |       |    |       |    |       |    |
| NCBI 16S               | 7     | 7     | 6  | 7     | 6  | 7     | 5  |
| Silva                  | 1     | 2     | 1  | 2     | 0  | 1     | 1  |
| Greengenes             | 0     | 0     | 0  | 0     | 0  | 0     | 0  |
| <b>Lactobacillus</b>   |       |       |    |       |    |       |    |
| NCBI 16S               | 8     | 8     | 5  | 6     | 5  | 6     | 4  |
| Silva                  | 5     | 3     | 1  | 4     | 3  | 5     | 2  |
| Greengenes             | 2     | 2     | 2  | 2     | 2  | 2     | 1  |
| <b>Staphylococcus</b>  |       |       |    |       |    |       |    |
| NCBI 16S               | 4     | 5     | 4  | 4     | 2  | 4     | 3  |
| Silva                  | 3     | 2     | 1  | 2     | 1  | 2     | 2  |
| Greengenes             | 1     | 1     | 1  | 1     | 0  | 1     | 1  |
| <b>Streptococcus</b>   |       |       |    |       |    |       |    |
| NCBI 16S               | 9     | 9     | 6  | 7     | 6  | 7     | 6  |
| Silva                  | 4     | 5     | 2  | 2     | 2  | 2     | 2  |
| Greengenes             | 1     | 1     | 0  | 1     | 1  | 1     | 1  |
| <b>Other</b>           |       |       |    |       |    |       |    |
| NCBI 16S               | 33    | 32    | 26 | 32    | 26 | 30    | 25 |
| Silva                  | 21    | 15    | 15 | 18    | 15 | 23    | 9  |
| Greengenes             | 8     | 8     | 8  | 8     | 8  | 8     | 6  |
| <b>Total</b>           |       |       |    |       |    |       |    |
| NCBI 16S               | 70    | 70    | 56 | 65    | 52 | 62    | 51 |
| Silva                  | 43    | 36    | 26 | 34    | 27 | 38    | 18 |
| Greengenes             | 15    | 15    | 14 | 15    | 13 | 14    | 11 |

243

244 **Validation of computational findings on V4 amplicon data.** To evaluate the performance of  
 245 our computational findings on actual data, we acquired targeted amplicon sequencing data from  
 246 24 urine samples. These urine samples were a subset of those that were used to derive cultures in  
 247 the Thomas-White dataset and thus should contain the same bacteria. Sequencing data were  
 248 generated as part of two other studies using Illumina sequencing of the V4 region of the 16S  
 249 rRNA gene(4,11). We reprocessed the raw sequencing data (see **Methods**) and performed  
 250 taxonomic classification to assess the performance of our computational findings. Since 16S  
 251 rRNA gene sequencing will detect many more bacteria than those identified even with enhanced  
 252 culture, we restricted the evaluation to only the bacteria that grew in culture from a given sample.  
 253 We used accuracy to assess the number of predicted matches that were correctly identified in the  
 254 V4 dataset, using classification schemes composed of the V4 identifier, each of three databases,  
 255 and the BLCA classifier (**Figure 7**). All databases had good accuracy with high proportions of  
 256 accurate identifications at the species level (80% for NCBI 16S, 86% for Silva, and 88% for  
 257 Greengenes). Accuracy was reduced when the default confidence score of 80% was applied  
 258 (61% for NCBI 16S, 67% for Silva, and 86% for Greengenes). The default confidence score of  
 259 50% reduced the accuracy of two of the classification schemes (76% for NCBI 16S and 80% for  
 260 Silva). We also evaluated classification schemes with the Naive Bayes classifier and found  
 261 similar results (**Supplemental Figures 4 and 5**)

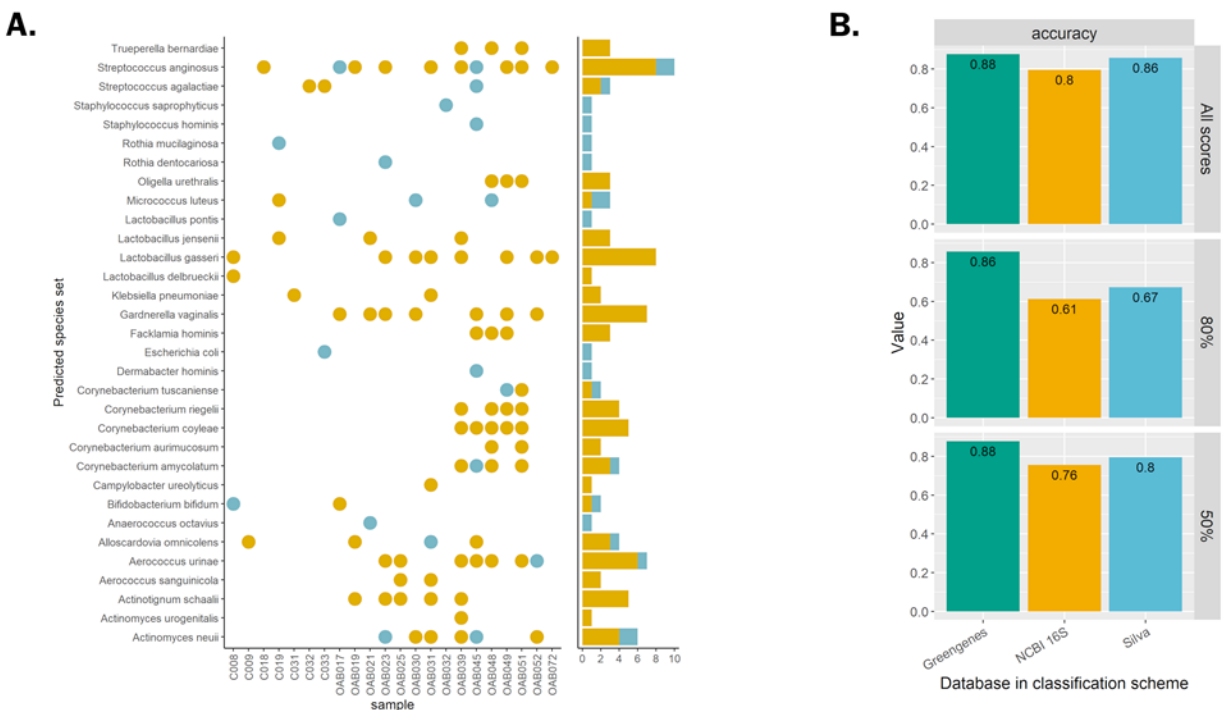

262

**Figure 7.** Taxonomic classification of the V4 validation dataset. A) Results when using a classification scheme including the V4 identifier, NCBI 16S database, and BLCA classifier. Blue dots represent species identified in cultured isolates, but not identified in targeted amplicon sequencing using this classification scheme. Yellow dots represent the species that were present in cultured isolates and successfully identified by the classification scheme. B) Summary of accuracy for classification schemes that use the V4 rRNA identifier, BLCA classifier, and the three databases (Greengenes, Silva and NCBI 16S). Rows show accuracy results when ignoring confidence scores, and when using confidence scores of 50% or 80% as thresholds.

## 263 Discussion

264 Our study demonstrates that it is possible to gain higher resolution results at the species level  
265 with existing resources when performing targeted amplicon sequencing of urinary specimens.  
266 Though higher resolution is possible, it requires a carefully chosen classification scheme. Within  
267 the classification scheme, the reference database strongly influences the identification of bacteria  
268 at the species level. Overall, we found the NCBI 16S database performs the best, whereas the  
269 Greengenes database performs the worst, primarily because it does not currently contain  
270 representatives of bladder bacteria. The identifier, or 16S rRNA variable region that is chosen,  
271 can also influence the types of bacterial species that are identified. The choice of classifier did  
272 not drastically affect the identification of species and thus is less critical within the classification  
273 scheme.

274 The largest limitation of any reference database is that the number of records of accurately  
275 classified bacteria is dwarfed by the number and diversity of unidentified sequences obtained  
276 through metagenomic sequencing of environmental samples. Because of the considerable  
277 amount of work required to construct and maintain databases, they will undoubtedly  
278 incompletely represent existing bacteria.

279 For species level taxonomy assignments, the reference database must contain species-level  
280 information. In other words, if species of bacteria are expected in a sample, it must be verified  
281 that the database contains those species. For example, we found that the Greengenes database  
282 does not currently contain many bacterial species that are found in the human bladder. In  
283 contrast, the NCBI 16S Microbial and Silva databases had representation of all species that were  
284 identified from prior studies of bladder bacteria. Thus, the latter two databases are better choices  
285 for evaluating bacterial species from the bladder.

286 While the databases reviewed in this study do have species-level information associated with the  
287 records, additional work was needed before species-level identification could be achieved with  
288 the Naïve Bayes classifier. This classifier requires a database that has undergone the "training"  
289 steps that convert the DNA sequences to the calculated frequencies that each  $k$ -mer occurs in a  
290 taxon. For available classification algorithms like the RDP classifier(25) and QIIME2(17), the  
291 training is only currently done to reliably identify bacteria to the genus level. For this study, it  
292 was necessary to train the Silva and NCBI 16S databases to the species level for use with the  
293 Naive Bayes classifier. While training the reference databases did take significant computational  
294 effort, once completed it was used repeatedly.

295 The classifiers used in this study are examples of two different strategies designed to overcome  
296 the common challenges of searching an extremely large dataset in order to find matching pairs of  
297 query sequences and reference records. While these two approaches are different in concept, we  
298 did not find significant differences in their performance for species-level classification of bladder  
299 bacteria.

300 BLCA is an example of sequence comparison by pairwise alignment. The strength of this  
301 method is due to the fact that the similarities between two DNA samples are directly compared.  
302 This is the most effective way to compare the characteristics of a sample to those that define a  
303 taxon; however, until recent advances in computer technology, it remained impractical because

304 of the computational burden. The Naive Bayes classifier is an example of a  $k$ -mer-based  
305 classification approach, and was designed to circumvent the computational challenges that are  
306 faced with use of a pairwise alignment classifier. However, there are limitations when using  
307 Naive Bayes for species-level identification. The first limitation arises from the database training  
308 process. If one taxon has more training examples than another, Naive Bayes generates  
309 unfavorable weights for the decision boundary(26). The second limitation is that all features (i.e.  
310 the  $k$ -mers generated from the DNA sequences) are assumed to be independent, and weights for  
311 taxa with strong dependencies among the associated  $k$ -mers are larger than those taxa with  
312 weakly dependent  $k$ -mers(26).

313 Finally, as shown by both the computational and V4 validation results, the use of the 50% or  
314 80% confidence score thresholds significantly reduced the recall and accuracy of the  
315 classification schemes. Precision increased in several cases, for example with classification  
316 schemes that use the NCBI 16S database or those that use the Silva database and Naïve Bayes  
317 classifier, but at the cost of severely decreasing the number of species identified. These results  
318 show that the default settings of 50% or 80% are restrictive, and limit the ability to detect bladder  
319 species, especially when using the Silva and Greengenes databases. This could be resolved  
320 through the use of a comparative data set to find the confidence score values yielding optimal  
321 performance of these classification schemes.

322 Affordable sequencing of large-scale data is presently done with short read sequencing  
323 technology, such as Illumina MiSeq. This is currently limited to sequencing reads up to 300  
324 nucleotides in length. Until full-length 16S rRNA gene sequencing can be achieved affordably  
325 on a large scale (such as with Oxford Nanopore and PacBio technologies), choosing the optimal  
326 region of the 16S rRNA gene for identification purposes remains a significant part of the  
327 experimental design. Thus, the variable regions that are used as identifiers require some  
328 consideration.

329 Our findings show that use of the V2-V3, and V1-V3 regions of the 16S rRNA gene allowed for  
330 the correct identification of the most bladder bacterial species when combined with the NCBI  
331 16S database and either classifier. In general, amplicons that span more than one variable region  
332 perform better than those that contain single variable regions. This is likely due to the increased  
333 information available with longer reads. It is important to note that longer reads can also have  
334 limitations, which are discussed in more detail below. While shorter variable regions, such as  
335 the V4 region, did not perform as well as longer amplicons, they were able to identify many  
336 bladder bacteria at the species level (52 out of 78). These shorter amplicons are widely used with  
337 Illumina sequencing and may be valid, depending on the study design and level of precision  
338 desired. However, other variable regions may be explored for practical application, or when  
339 more detailed information is desired.

340 By taking a computational approach to evaluating classification schemes that are capable of  
341 identifying bladder bacterial species, we were able to thoroughly assess the ability of  
342 classification schemes to identify known bacterial species. However, there are several practical  
343 limitations of amplicon sequencing that were not captured in this approach.

344 Targeted amplicons are generated by priming the polymerase chain reaction with specially  
345 designed oligonucleotides (PCR primers). The challenge of PCR primer design is to identify a



346 sequence of nucleotides that will anneal to only one location on the template DNA. Finding  
347 suitable annealing sites that flank the variable region of interest becomes very difficult when  
348 considering the 16S rRNA gene sequence of many species. We used published primers to create  
349 computational amplicons, but this may not reflect the actual experimental efficiency. Finally,  
350 quality control with DNA sequence processing must be conducted before classification is  
351 performed. Targeted amplicon sequencing generates a large number of overlapping reads and  
352 provides the data for methods to correct for errors introduced by the polymerase enzyme. After  
353 error correction, similar reads are aggregated into operational taxonomic units or amplicon  
354 sequence variants. The last step is to attempt to merge reads that are complementary before  
355 attempting to classify them. If the sequence reads do not overlap, loss of phylogenetic  
356 information occurs in the gaps and impacts the accuracy of identification, which may occur for  
357 longer amplicons, such as the V1-V3 and V4-V6 regions.

358 In our study, we identified the V1-V3 region of the 16S rRNA gene as having the greatest  
359 taxonomic resolution for the bacteria that are found in the bladder. This may be attributed to the  
360 high occurrence of insertions and deletions (indels) in the conserved regions between the first  
361 three variable regions across the bacteria in the Thomas-White dataset. Designing one degenerate  
362 primer set that would amplify the entire dataset may not be possible for this region. A future  
363 research direction could be to stratify the Thomas-White dataset into smaller, more closely  
364 related phylogenetic groups for more specific primer design.

## 365 **Conclusion**

366 Species level taxonomy assignment will greatly benefit studies focused on the urobiome and its  
367 relationship to bladder health and disease. Our results show that it is possible to reliably classify  
368 bladder bacterial species using targeted amplicon sequencing of the 16S rRNA gene variable  
369 regions with existing classification algorithms and databases. We determined that the most  
370 important component of the classification scheme is the database used, and that the NCBI  
371 database allows for best identification of bladder species. Our validation with V4 amplicon data  
372 demonstrates that the predicted computational outcomes are a good approximation for how a  
373 classification scheme will perform on real data. The knowledge that a majority of the predicted  
374 matches reflect reality is encouraging. It can be expected that the alternate variable regions  
375 covered in this study, such as the V2-V3 region of the 16S rRNA gene, would have similar  
376 outcomes.

377 Importantly, we found that no single variable region gives 100% coverage of all bladder bacteria  
378 species. Thus, the choice of variable region may significantly affect the results of a given study.  
379 One approach to resolve this could be to use multiple amplicon sequencing or long read  
380 sequencing technology. These technologies are emerging and may prove to be beneficial for the  
381 urobiome community. Furthermore, no database has 100% coverage across a variable region.  
382 This could be resolved by using more than one database for classification, though this approach  
383 is complicated by differences in databases in terms of formatting, as well as conflicting  
384 classifications. Both of these components are important for planning experimental and  
385 computational aspects of urobiome studies, and should be considered when comparing results  
386 across studies.

387

## 388 **Material and Methods**

389 **Code resources.** All scripts that were written for this project can be found in the GitHub  
390 repository (<https://github.com/lakarstens/BladderBacteriaSpecies>). All scripts sourced from this  
391 repository are referred to as “custom.”

392 **The Thomas-White dataset.** The 78 species of bladder bacteria used in this study were  
393 identified by culturing 149 urine samples and performing whole-genome sequencing, as  
394 described in Thomas-White et al.(20). This set of identified species served as the basis for our  
395 computational analysis and is referred to as the Thomas-White dataset. For each species  
396 identified, the 16S rRNA gene sequence of the corresponding type strain was downloaded from  
397 the Silva v132 release (<https://www.arb-silva.de/>) on 4/27/2019. A *type strain* is the sequence of  
398 the cultured isolate that was subject to the metabolic, genotypic and phenotypic evaluations taken  
399 to define the bacterial species(27), and is the agreed bacterial organism to which the taxonomic  
400 name refers. Sequences were searched using the “[T]” filter setting, and sequences longer than  
401 1450 nt with alignment and pintail quality scores greater than 95% were selected. For the species  
402 that had no hits, the taxonomic synonym (see below) was used as the search query, if available.  
403 One unidentified *Corynebacterium* species had no type strain available, and was excluded from  
404 the analysis.

405 **The V4 validation dataset.** Targeted amplicon sequences from 24 urine samples, using the  
406 V4 region of the 16S rRNA gene sequence, is referred to as the V4 validation dataset. These 24  
407 urine samples originated from a subsample of the women whose samples comprised the Thomas-  
408 White dataset. Sequencing data were generated as part of two other published studies using  
409 Illumina sequencing of the V4 region of the 16S rRNA gene(4,11). The raw sequence reads were  
410 processed with DADA2 version 1.14.1(18) to generate amplicon sequence variants (ASVs). The  
411 ASVs were subjected to taxonomic classification with the BLCA algorithm.

412 **Synonyms of species.** Species names have changed in response to advances in bacterial  
413 systematics. All currently known species synonyms were downloaded from the Prokaryotic  
414 Nomenclature Up-to-Date(28) (PNU) website on 1/5/2020. PNU includes information down to  
415 the strain level, but these entries were consolidated to the species level. For example, entries like  
416 *Enterobacter cloacae* and *Enterobacter cloacae dissolvens* are treated as synonyms of  
417 *Enterobacter cloacae*. Classification results were then checked for synonyms using the custom  
418 “validate\_match\_batch.py” script.

419 **Databases.** The Greengenes database version 13\_5 was downloaded on 9/23/19 from  
420 ([http://greengenes.secondgenome.com/?prefix=downloads/greengenes\\_database/gg\\_13\\_5/](http://greengenes.secondgenome.com/?prefix=downloads/greengenes_database/gg_13_5/)). For  
421 use with BLCA, the database was processed using the provided “1.subset\_db\_gg.py” script  
422 (<https://github.com/qunfengdong/BLCA/>). For use with the Qiime2 package, the FASTA file  
423 was reformatted to work with Qiime2 using the custom “write\_qiime\_train\_db.py” script, and  
424 trained to work with the Naive Bayes classifier with the provided “fit-classifier-naive-bayes”  
425 script.

426 The Silva database version 132 was downloaded on 9/14/19 from ([https://www.arb-](https://www.arb-silva.de/no_cache/download/archive/release_132/Exports/)  
427 [silva.de/no\\_cache/download/archive/release\\_132/Exports/](https://www.arb-silva.de/no_cache/download/archive/release_132/Exports/)) as a FASTA formatted file. The  
428 FASTA file was compiled into a database that could be used with BLCA by using the

429 "makeblastdb" utility provided in the Blast+ suite. The taxonomy file that was required by  
430 BLCA was generated with the custom "write\_taxonomy.py" script. For use with the Qiime2  
431 package, the FASTA file was reformatted to work with Qiime2 using the custom  
432 "write\_qiime\_train\_db.py" script, and trained to work with the Naive Bayes classifier with the  
433 provided "fit-classifier-naive-bayes" Qiime2 script.

434 The 16SMicrobial database is bundled with the BLCA package, but is available from  
435 (<ftp://ftp.ncbi.nlm.nih.gov/blast/db/>). For use with BLCA, the database was processed using the  
436 provided "1.subset\_db\_acc.py" script included with BLCA. For use with the Qiime2 package, a  
437 FASTA file was extracted from the bundled BLCA database using "blastdbcmd" utility provided  
438 in the Blast+ suite, and reformatted to work with Qiime2 using the custom  
439 "write\_qiime\_train\_db.py" script. The database was trained to work with the Naive Bayes  
440 classifier with the provided "fit-classifier-naive-bayes" script included in Qiime2.

441 **Presence of Thomas-White species in databases.** To verify that all species from the  
442 Thomas-White dataset were present in the databases used in this study, each database was first  
443 converted to a FASTA file (if needed) using the "blastdbcmd" utility included in the Blast+ suite.  
444 The FASTA file was then searched using regular expressions and the Linux command-line  
445 program *grep* for a match of each species in the dataset. The commands were implemented using  
446 the custom "species\_in\_db.bash" script. The presence or absence of each species was recorded.

447 **Multisequence alignment.** The 16S gene sequences from the Thomas-White dataset were  
448 formed into a multi-sequence alignment using the T-coffee program(29). T-coffee version  
449 12.00.7fb08c2 was downloaded from (<http://tcoffee.org/Packages/Stable/Latest/>) on 4/5/2019.  
450 Alignments were performed using the default settings.

451 **Sliding window analysis.** Comparing the 16S rRNA gene sequences of the species in the  
452 Thomas-White dataset reveals regions of conserved sequence and regions of variability. The  
453 degree that variable regions of species differ from each other can aid the identification of each  
454 species; therefore, quantifying the amount of variability of a region across a set of species is  
455 important.

456 Sliding window analysis (SWA) is the method by which a list of subsequences are generated by  
457 taking successive groups of equal size, in the manner of a window of fixed length sliding across  
458 the full sequence. Quantifying the amount of variability along a MSA is achieved by combining  
459 SWA with calculating the Shannon Entropy contained in each column framed by the window.

460 The minimum Shannon entropy occurs when all nucleotides in a position (column) of the MSA  
461 are the same. The maximum occurs when all possible nucleotides in the MSA are present at that  
462 position. However, the Shannon Entropy treats gaps in a sequence as relevant, where in practice  
463 gaps reflect an absence of useful information. Multisequence alignments can generate many  
464 columns of gap characters due to insertions or deletions (indels) in the respective sequences that  
465 make up the MSA. A consequence of treating gaps as relevant is the Shannon Entropy will  
466 interpret these indel regions as conserved sequence. This limitation was overcome by weighting  
467 the entropy scores against gaps(30). The locations of known variable regions of the 16S gene  
468 sequence were validated, and the relative amount of variability was quantified, using the custom  
469 "weighted\_ent.py" script.

470 **Primers.** Amplicons were computationally generated from the Thomas-White genome  
471 sequencing dataset for the V1-V3, V2-V3, V3-V4, V4-V6, and V4 variable regions using  
472 published primers and the V3 and V6 regions using designed primers. The primer sequences  
473 used, listed in order of amplicon spanning variable region(s), forward primer name and sequence,  
474 reverse primer name and sequence are: **V1-V3:** A17F 5'-GTT TGA TCC TGG CTC AG-3', 515R  
475 5'-TTA CCG CGG CMG CSG GCA-3'(31,32). **V2-V3:** 16S\_BV2f 5'-AGT GGC GGA CGG  
476 GTG AGT AA-3', HDA-2 5'-GTA TTA CCG CGG CTG CTG GCA C-3'(33,34). **V3:** v3\_579F  
477 5'-THT TSS RCA ATG GRS GVA-3', v3\_779R 5'-GKN SCR AGC STT RHY CGG-3'. **V3-V4:**  
478 V3F 5'-CCT ACG GGA GGC AGC AG-3', V4R 5'-GGA CTA CHV GGG TWT CTA AT-  
479 3'(35). **V4:** F515 5'-GTG CCA GCM GCC GCG GTA A-3', R806 5'-CCT GAT GHV CCC  
480 AWA GAT TA-3'(36). **V4-V6:** 519F 5'-GTG CCA GCT GCC GCG GTA ATA-3', 1114R 5'-  
481 GGG GTT GCG CTC GTT GC-3'(32). **V6:** v6\_1183F 5'-CCG CCT GGG GAS TAC GVH-3',  
482 v6\_1410R 5'-AGT CCC RYA ACG AGC GCA-3'. Degenerate primer design was employed to  
483 generate primer sets for the V3 and V6 regions of the 16S rRNA gene that would anneal to as  
484 many species in the Thomas-White dataset as possible with DegePrime(37)  
485 (<https://github.com/EnvGen/DEGEPRIME.git>). DegePrime has the option to ignore columns of a  
486 MSA if the number of "-" characters exceed a user-defined threshold. The MSAs were  
487 preprocessed with this threshold set to .01. The main script of DegePrime was run using a  
488 degeneracy setting of 4096 and a window length of 18.

489 **Extracting computational amplicons.** For each primer set, the DNA sequence  
490 bracketed by the forward and reverse primers was extracted from the multisequence alignment.  
491 Coordinates of the MSA were identified by searching the *E. coli* sequence (accession number  
492 EU014689.1.1541) included in the MSA for a match to the forward and reverse primer  
493 sequences, and then mapping those position to the MSA of the Thomas-White dataset. This  
494 procedure was done using the custom "extract\_16s\_vr.py" script and output as a multi-record  
495 FASTA formatted file.

496 **Taxonomic classifiers.** Taxonomic classification was performed with Bayesian lowest  
497 common ancestor (BLCA) and Naïve Bayes classifiers. BLCA(19) was cloned from the  
498 GitHub repository <https://github.com/qunfengdong/BLCA.git>. For the 16S variable regions, the  
499 BLCA was run using default settings but pointing to the selected reference database, either  
500 Greengenes, Silva, or NCBI 16S. The Naïve Bayes classifier as implemented by Qiime2(17) was  
501 used with the Greengenes, Silva, and NCBI 16S databases and a confidence setting of 0, 50, and  
502 80, but otherwise default settings.

503 **Evaluating computational results.** To evaluate the taxonomic classification results of  
504 each classification scheme on the computational amplicon dataset, the custom  
505 "new\_taxonomy\_results\_2020-3-14.Rmd" file was used. These scripts compare the results of  
506 each record pair (each comparison between the query sequence and sequence held in the  
507 reference database) from the classification scheme to the known identify of the query sequence  
508 from the Thomas-White dataset. All record pairs that were assigned a match by the classification  
509 schemes were evaluated according to the following definitions (**Figure 8**):

510 **True match** - All record pairs assigned as a match that have identical genus and species  
511 labels.

512 **False match** - All record pairs assigned as a match that did not have identical genus and  
 513 species labels.  
 514 **False non-match** - If a record representing a species in the Thomas-White dataset was  
 515 present in the database, but was not assigned as a match, the record was evaluated as a  
 516 false non-match.  
 517 **True non-match** - All records in the reference database that were not in the Thomas-  
 518 White dataset. While records assigned to this category were not used in evaluating the  
 519 classification schemes in this manuscript, the definition is still included for completeness.  
 520  
 521  
 522

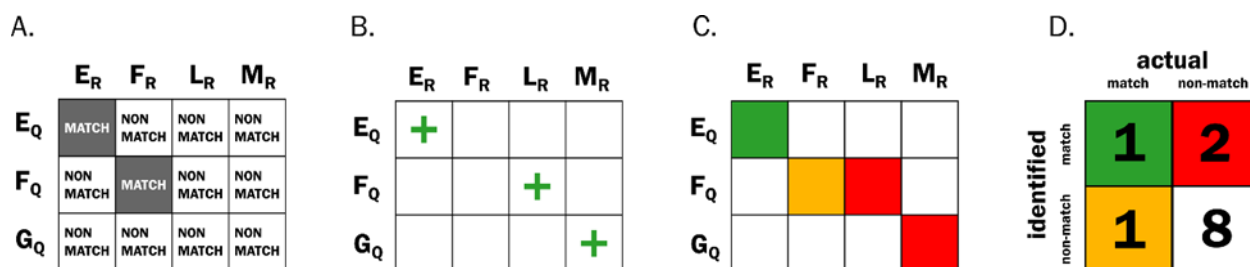

**Figure 8. Example of classification evaluation used in this study.** Suppose there is a classification scheme comprising a set of query sequences (the rows E,F,G) and the set of reference sequences (the columns E,F,L,M) held in a reference database. In this example, the number of reference records is greater than the query records, and the reference is missing a corresponding G record from the query set. **A)** If the query and reference record letters are the same, then they are designated as a **match**. If they are different they are designated as a **non-match**. **B)** Next, the classifier is allowed to assign record pairs as matches or non-matches for all query sequences, represented as green plus signs for matches and blank cells as non-matches. Some results are correct, and some are not. Note that despite the lack of a matching record in the reference database, the classifier still designated the (G:M) pair as a match. **C)** Using the definitions for assigning the classifications to the confusion matrix, there is one **true match** (green square), two **false matches** (red squares), one **false non-match** (yellow square), and 8 **true non-matches** (white squares). **D)** The cell values of the confusion matrix are then filled out, and performance measurements can be calculated. For this classification scheme, the precision is  $1/(1+2)=.33$ , recall is  $1/(1+1)=.5$ , and the F-measure is  $(2*.33*.5)/(.33+.5)=.40$ .

523 **Performance measures.** Recall, precision and the F-measure were used to evaluate the  
 524 performance of each classification scheme implemented. Recall refers to the proportion of  
 525 matches that the classification scheme correctly identified (true matches) out of all possible  
 526 matches (true matches plus false non-matches). Precision refers to the proportion of matches that  
 527 the classification scheme called correctly (true matches) out of all classified matches (true  
 528 matches plus false matches). The F-measure is the equally weighted harmonic mean of recall and  
 529 precision. For this study, we chose to maximize recall over precision, because the number of true  
 530 matches impacts the subsequent work on diversity measures, such as species richness and  
 531 evenness(38).

532 **Evaluating V4 validation results.** The species of bacteria in the V4 sequencing data  
 533 were identified using classification schemes composed of the V4 sequencing results as the  
 534 identifier, BLCA classifier, and the Greengenes, Silva, and NCBI 16S microbial databases. To  
 535 determine the expected bacterial species in each sample, the results of the whole genome  
 536 sequencing on the isolates cultured from the corresponding subject was used. For each



537 classification scheme, accuracy was calculated by enumerating the number of species identified  
 538 by WGS that were also identified by the V4 16S targeted amplicon sequencing using the custom  
 539 "real\_world\_data\_2020-4-17.Rmd" file.

540 The results of the V4 validation set were evaluated according to the following definitions  
 541 (Figure 9):

542 **True match** - All matches from the computational classification scheme that were  
 543 correctly identified by V4 16S targeted amplicon sequencing

544 **False match** - All species identified by V4 16S targeted amplicon sequencing that were  
 545 not identified by the computational classification scheme

546 **False non-match** - All matches from the computational classification scheme that were  
 547 not identified by V4 16S targeted amplicon sequencing

548 **True non-match** - All species that were not identified by either the computational  
 549 classification schemes or the V4 16S targeted amplicon sequencing

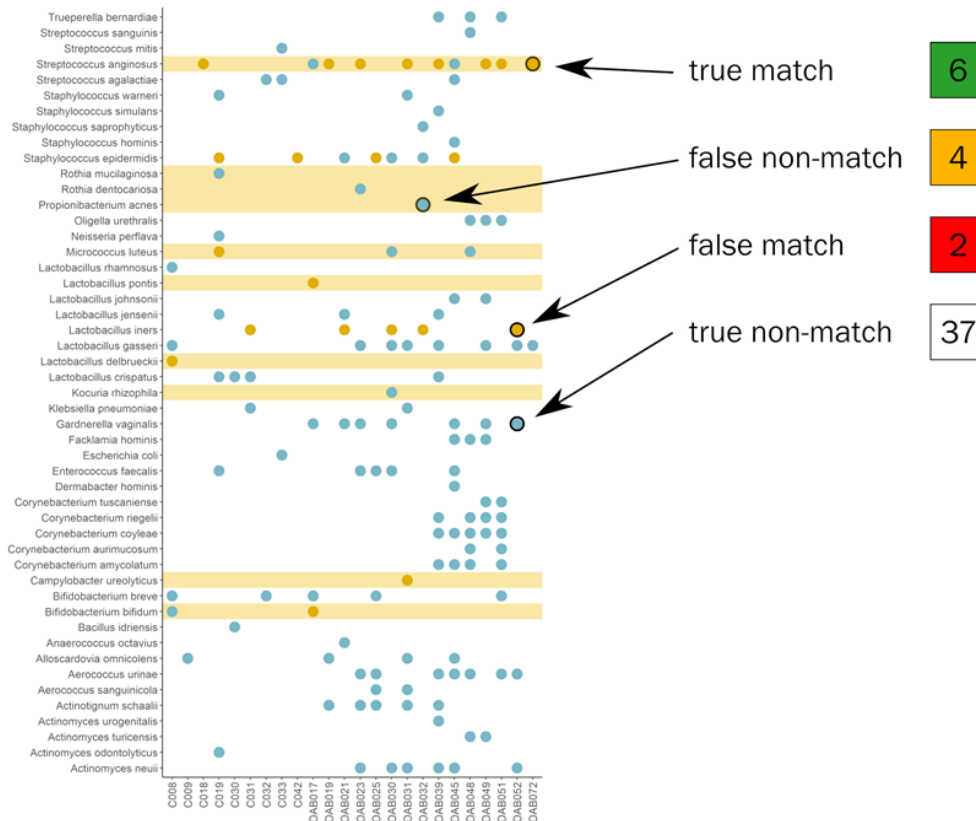

**Figure 9: Definitions of how the classification scheme outcomes are assigned to the cells of the confusion matrix for the V4 validation results.** This example shows the classification scheme composed of the Greengenes database, BLCA classifier, and the V4 region of the 16S rRNA gene as the identifier. When the Thomas-White dataset is subsetted by the 24 samples that underwent targeted amplicon sequencing, a smaller set of 49 species remains. The light yellow rows indicate the species correctly identified by the computational classification scheme. Blue dots represent species identified in the collected samples by whole genome sequencing after expanded urine culturing and isolation. Yellow dots indicate the species were identified in those samples by V4 targeted amplicon sequencing. Yellow dots in light yellow rows are true matches, when found elsewhere they are false matches. Blue dots in the light yellow rows are false non-matches, when found elsewhere they are true non-matches.

550 **Data Availability.**

551 This project used previously acquired publicly available data.<sup>20</sup> All code that was written for this  
552 project can be found in the GitHub repository:

553 <https://github.com/lakarstens/BladderBacteriaSpecies>.

554

555 **Acknowledgements.**

556 This work was supported by the National Institutes of Health (NIH): NIDDK award number K01  
557 DK116706 (LK); NIA award numbers R03 AG060082 and P30AG028716 (NS). The content of  
558 the manuscript is solely our responsibility and does not represent the official views of the NIH or  
559 any other funding agency

560

561 **Author contributions.**

562 CH and LK conceived and designed experiments, and wrote the manuscript. CH performed  
563 analyses, LK reviewed analyses. AJW supplied the data. LK, CH, MM, HS, TG, IF, NS, and  
564 AJW interpreted results and revised the manuscript.

565 **References**

- 566 1. Lederberg J, McCray AT. 'Ome Sweet 'Omics-- A Genealogical Treasury of Words.  
567 The Scientist. 2001 Apr 2;15(7):2.
- 568 2. Wolfe AJ, Toh E, Shibata N, Rong R, Kenton K, FitzGerald M, et al. Evidence of  
569 Uncultivated Bacteria in the Adult Female Bladder. J Clin Microbiol. 2012 Apr  
570 1;50(4):1376–83.
- 571 3. Khasriya R, Sathiananthamoorthy S, Ismail S, Kelsey M, Wilson M, Rohn JL, et al.  
572 Spectrum of Bacterial Colonization Associated with Urothelial Cells from Patients  
573 with Chronic Lower Urinary Tract Symptoms. J Clin Microbiol. 2013 Jul  
574 1;51(7):2054–62.
- 575 4. Pearce MM, Hilt EE, Rosenfeld AB, Zilliox MJ, Thomas-White K, Fok C, et al. The  
576 Female Urinary Microbiome: a Comparison of Women with and without Urgency  
577 Urinary Incontinence. Blaser MJ, editor. mBio. 2014 Jul 8;5(4):e01283-14.
- 578 5. Fouts DE. Next Generation Sequencing to Define Prokaryotic and Fungal Diversity  
579 in the Bovine Rumen. PLOS ONE. 2012;7(11).
- 580 6. Price TK, Dune T, Hilt EE, Thomas-White KJ, Kliethermes S, Brincat C, et al. The  
581 Clinical Urine Culture: Enhanced Techniques Improve Detection of Clinically  
582 Relevant Microorganisms. Forbes BA, editor. J Clin Microbiol. 2016  
583 May;54(5):1216–22.
- 584 7. Ackerman AL, Underhill DM. The mycobiome of the human urinary tract: potential  
585 roles for fungi in urology. Ann Transl Med. 2017 Jan;5:31–31.
- 586 8. Karstens L, Asquith M, Davin S, Stauffer P, Fair D, Gregory WT, et al. Does the  
587 Urinary Microbiome Play a Role in Urgency Urinary Incontinence and Its Severity?  
588 Front Cell Infect Microbiol. 2016 Jul 27;6.

- 589 9. Pearce MM, Zilliox MJ, Rosenfeld AB, Thomas-White KJ, Richter HE, Nager CW,  
590 et al. The female urinary microbiome in urgency urinary incontinence. *Am J Obstet*  
591 *Gynecol.* 2015 Sep;213(3):347.e1-347.e11.
- 592 10. Thomas-White KJ, Gao X, Lin H, Fok CS, Ghanayem K, Mueller ER, et al. Urinary  
593 microbes and postoperative urinary tract infection risk in urogynecologic surgical  
594 patients. *Int Urogynecology J.* 2018 Dec;29(12):1797–805.
- 595 11. Thomas-White KJ, Hilt EE, Fok C, Pearce MM, Mueller ER, Kliethermes S, et al.  
596 Incontinence medication response relates to the female urinary microbiota. *Int*  
597 *Urogynecology J.* 2016 May;27(5):723–33.
- 598 12. Kliem M, Sauer S. The essence on mass spectrometry based microbial diagnostics.  
599 *Curr Opin Microbiol.* 2012 Jun;15(3):397–402.
- 600 13. Pace NR. A Molecular View of Microbial Diversity and the Biosphere. *Science.* 1997  
601 May 2;276(5313):734–40.
- 602 14. Yang B, Wang Y, Qian P-Y. Sensitivity and correlation of hypervariable regions in  
603 16S rRNA genes in phylogenetic analysis. *BMC Bioinformatics.* 2016 Dec;17(1):135.
- 604 15. Hugenholtz P, Skarshewski A, Parks DH. Genome-Based Microbial Taxonomy  
605 Coming of Age. *Cold Spring Harb Perspect Biol.* 2016 Jun;8(6).
- 606 16. Pruesse E, Quast C, Knittel K, Fuchs BM, Ludwig W, Peplies J, et al. SILVA: a  
607 comprehensive online resource for quality checked and aligned ribosomal RNA  
608 sequence data compatible with ARB. *Nucleic Acids Res.* 2007 Nov 14;35(21):7188–  
609 96.
- 610 17. Bolyen E, Rideout JR, Dillon MR, Bokulich NA, Abnet CC, Al-Ghalith GA, et al.  
611 Reproducible, interactive, scalable and extensible microbiome data science using  
612 QIIME 2. *Nat Biotechnol.* 2019 Aug;37(8):852–7.
- 613 18. Callahan BJ, McMurdie PJ, Rosen MJ, Han AW, Johnson AJA, Holmes SP.  
614 DADA2: High-resolution sample inference from Illumina amplicon data. *Nat*  
615 *Methods.* 2016 Jul;13(7):581–3.
- 616 19. Gao X, Lin H, Revanna K, Dong Q. A Bayesian taxonomic classification method for  
617 16S rRNA gene sequences with improved species-level accuracy. *BMC*  
618 *Bioinformatics.* 2017 Dec;18(1):247.
- 619 20. Thomas-White K, Forster SC, Kumar N, Kuiken MV, Putonti C, Stares MD, et al.  
620 Culturing of female bladder bacteria reveals an interconnected urogenital  
621 microbiota. *Nat Commun.* 2018 Apr 19;9(1):1557.
- 622 21. Breitwieser FP, Lu J, Salzberg SL. A review of methods and databases for  
623 metagenomic classification and assembly. *Brief Bioinform.* 2019 Jul 19;20(4):1125–  
624 36.

- 625 22. Hugerth LW, Andersson AF. Analysing Microbial Community Composition through  
626 Amplicon Sequencing: From Sampling to Hypothesis Testing. *Front Microbiol.*  
627 2017;8.
- 628 23. DeSantis TZ, Hugenholtz P, Larsen N, Rojas M, Brodie EL, Keller K, et al.  
629 Greengenes, a Chimera-Checked 16S rRNA Gene Database and Workbench  
630 Compatible with ARB. *Appl Env Microbiol.* 2006 Jul 1;72(7):5069–72.
- 631 24. Quast C, Pruesse E, Yilmaz P, Gerken J, Schweer T, Yarza P, et al. The SILVA  
632 ribosomal RNA gene database project: improved data processing and web-based  
633 tools. *Nucleic Acids Res.* 2012 Nov 27;41(D1):D590–6.
- 634 25. Wang Q, Garrity GM, Tiedje JM, Cole JR. Naive Bayesian Classifier for Rapid  
635 Assignment of rRNA Sequences into the New Bacterial Taxonomy. *Appl Environ*  
636 *Microbiol.* 2007 Aug 15;73(16):5261–7.
- 637 26. Rennie JDM, Shih L, Teevan J, Karger DR. Tackling the Poor Assumptions of Naive  
638 Bayes Text Classifiers. 2003;8.
- 639 27. Rainey FA. How to Describe New Species of Prokaryotes. In: *Methods in*  
640 *Microbiology.* Elsevier; 2011. p. 7–14.
- 641 28. Parte AC. LPSN – List of Prokaryotic names with Standing in Nomenclature  
642 (bacterio.net), 20 years on. *Int J Syst Evol Microbiol.* 2018 Jun 1;68(6):1825–9.
- 643 29. Notredame C, Higgins DG, Heringa J. T-coffee: a novel method for fast and  
644 accurate multiple sequence alignment 1 Edited by J. Thornton. *J Mol Biol.* 2000  
645 Sep;302(1):205–17.
- 646 30. Valdar WSJ. Scoring residue conservation. *Proteins Struct Funct Bioinforma.*  
647 2002;48(2):227–41.
- 648 31. Kumar PS, Griffen AL, Moeschberger ML, Leys EJ. Identification of Candidate  
649 Periodontal Pathogens and Beneficial Species by Quantitative 16S Clonal Analysis.  
650 *J Clin Microbiol.* 2005 Aug 1;43(8):3944–55.
- 651 32. Kumar P, Brooker M, Dowd S, Camerlengo T. Target Region Selection Is a Critical  
652 Determinant of Community Fingerprints Generated by 16S Pyrosequencing. *PLOS*  
653 *ONE.* 2011 Jun;6(6).
- 654 33. Bukin YuS, Galachyants YuP, Morozov IV, Bukin SV, Zakharenko AS, Zemskaya TI.  
655 The effect of 16S rRNA region choice on bacterial community metabarcoding  
656 results. *Sci Data.* 2019 Mar;6(1):190007.
- 657 34. Walter J, Tannock GW, Tilsala-Timisjarvi A, Rodtong S, Loach DM, Munro K, et al.  
658 Detection and Identification of Gastrointestinal *Lactobacillus* Species by Using  
659 Denaturing Gradient Gel Electrophoresis and Species-Specific PCR Primers. *Appl*  
660 *Environ Microbiol.* 2000 Jan 1;66(1):297–303.

- 661 35. Graspentner S, Loeper N, Künzel S, Baines JF, Rupp J. Selection of validated  
662 hypervariable regions is crucial in 16S-based microbiota studies of the female  
663 genital tract. *Sci Rep.* 2018 Dec;8(1):9678.
- 664 36. Caporaso JG, Lauber CL, Walters WA, Berg-Lyons D, Lozupone CA, Turnbaugh PJ,  
665 et al. Global patterns of 16S rRNA diversity at a depth of millions of sequences per  
666 sample. *Proc Natl Acad Sci.* 2011 Mar 15;108(Supplement\_1):4516–22.
- 667 37. Hugerth LW, Wefer HA, Lundin S, Jakobsson HE, Lindberg M, Rodin S, et al.  
668 DegePrime, a Program for Degenerate Primer Design for Broad-Taxonomic-Range  
669 PCR in Microbial Ecology Studies. Löffler FE, editor. *Appl Environ Microbiol.* 2014  
670 Aug 15;80(16):5116–23.
- 671 38. Morris EK, Caruso T, Buscot F, Fischer M, Hancock C, Maier TS, et al. Choosing  
672 and using diversity indices: insights for ecological applications from the German  
673 Biodiversity Exploratories. *Ecol Evol.* 2014 Sep;4(18):3514–24.

674

675

676

677

678

679

680

681

682

683

684

685

686

687

688



689 **Supplemental Figures**

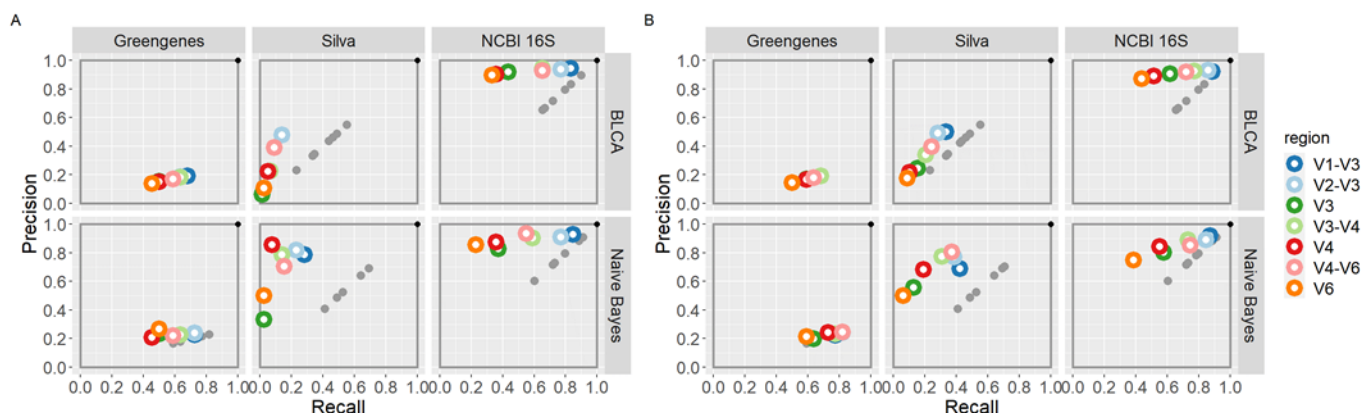

690  
 691 **Supplemental Figure 1.** Classification scheme precision and recall when using a confidence  
 692 scores of (A) 80% and (B) 50% as a threshold. The schemes that use the Silva database have  
 693 very low recall compared to when the confidence score is ignored (gray dots), whereas schemes  
 694 that use Greengenes and NCBI 16S are not as affected.  
 695

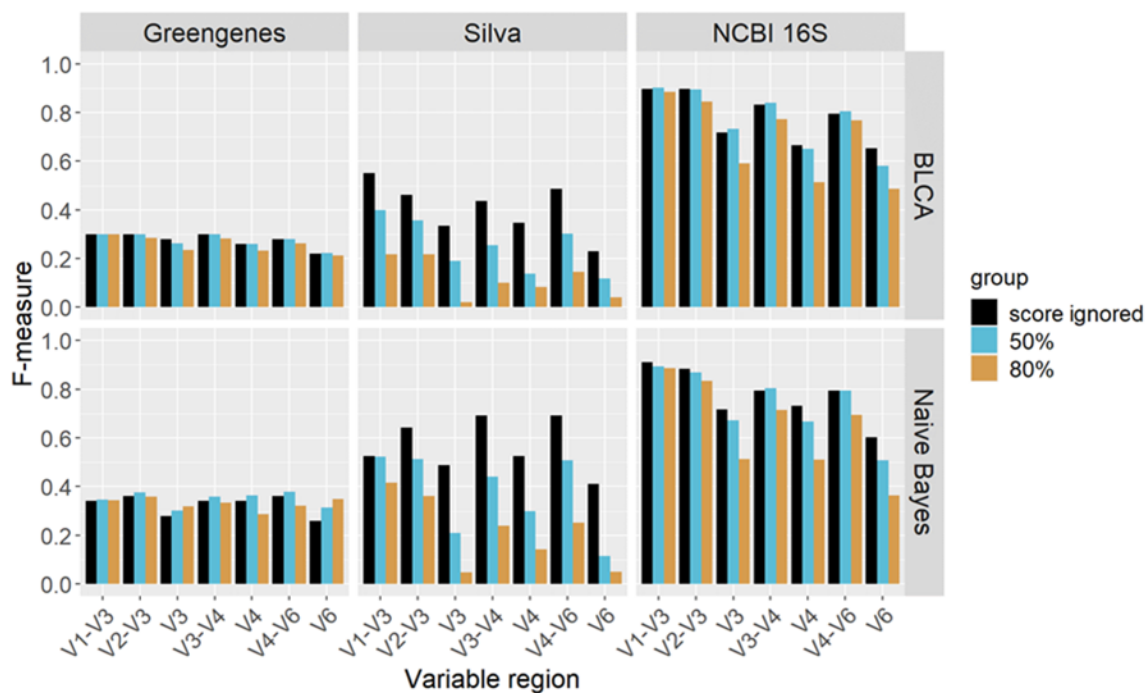

696  
 697  
 698 **Supplemental Figure 2.** F-measure values for all classification schemes. Values shown are for  
 699 confidence scores of 50%, 80%, and when confidence scores are ignored.  
 700

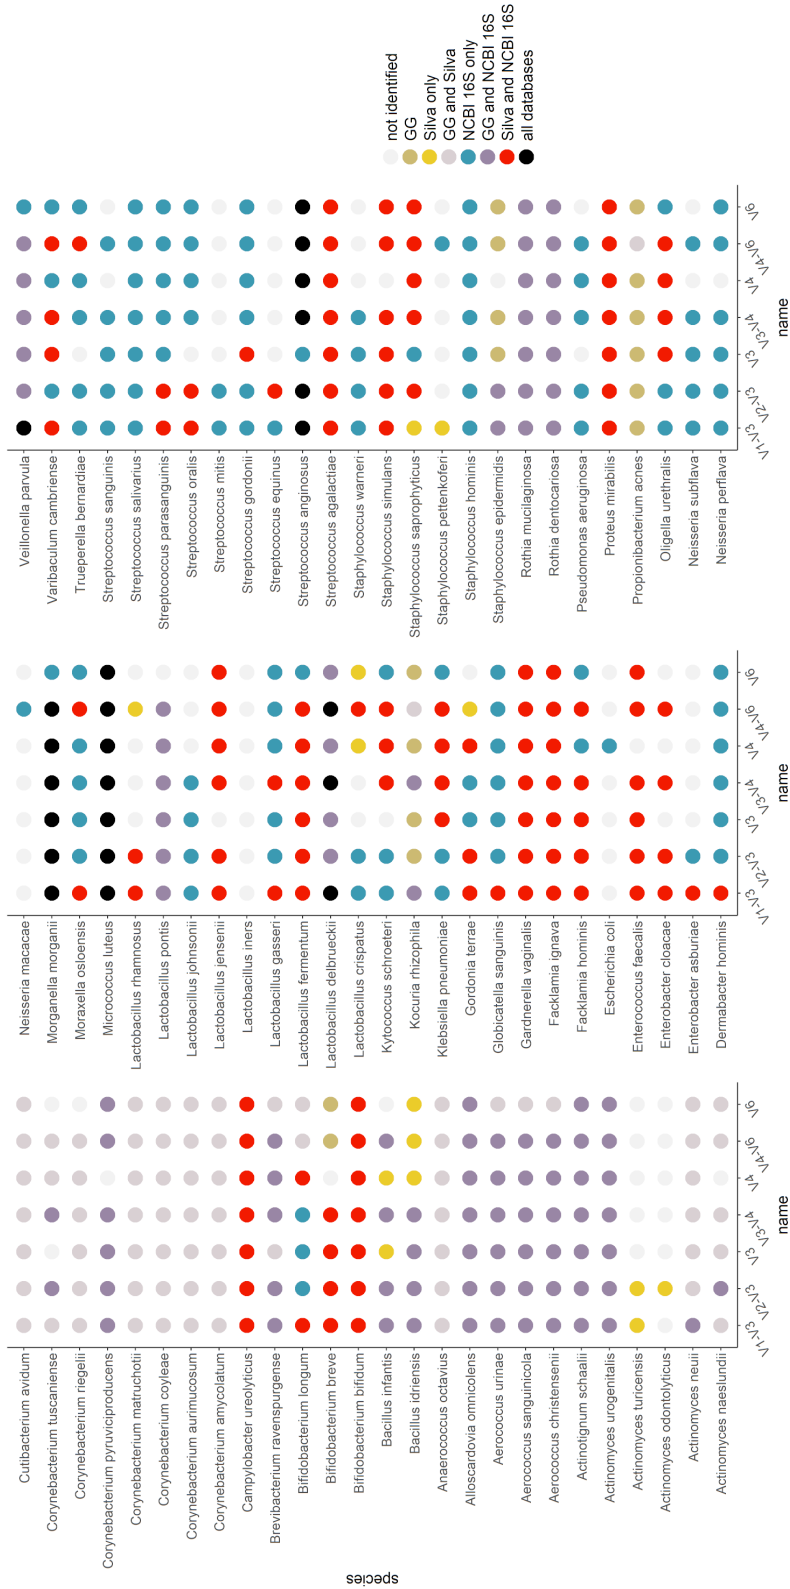

701 **Supplemental Figure 3.** Bladder bacterial species identified by database, variable region, and  
 702 BLCA classifier.

703  
704

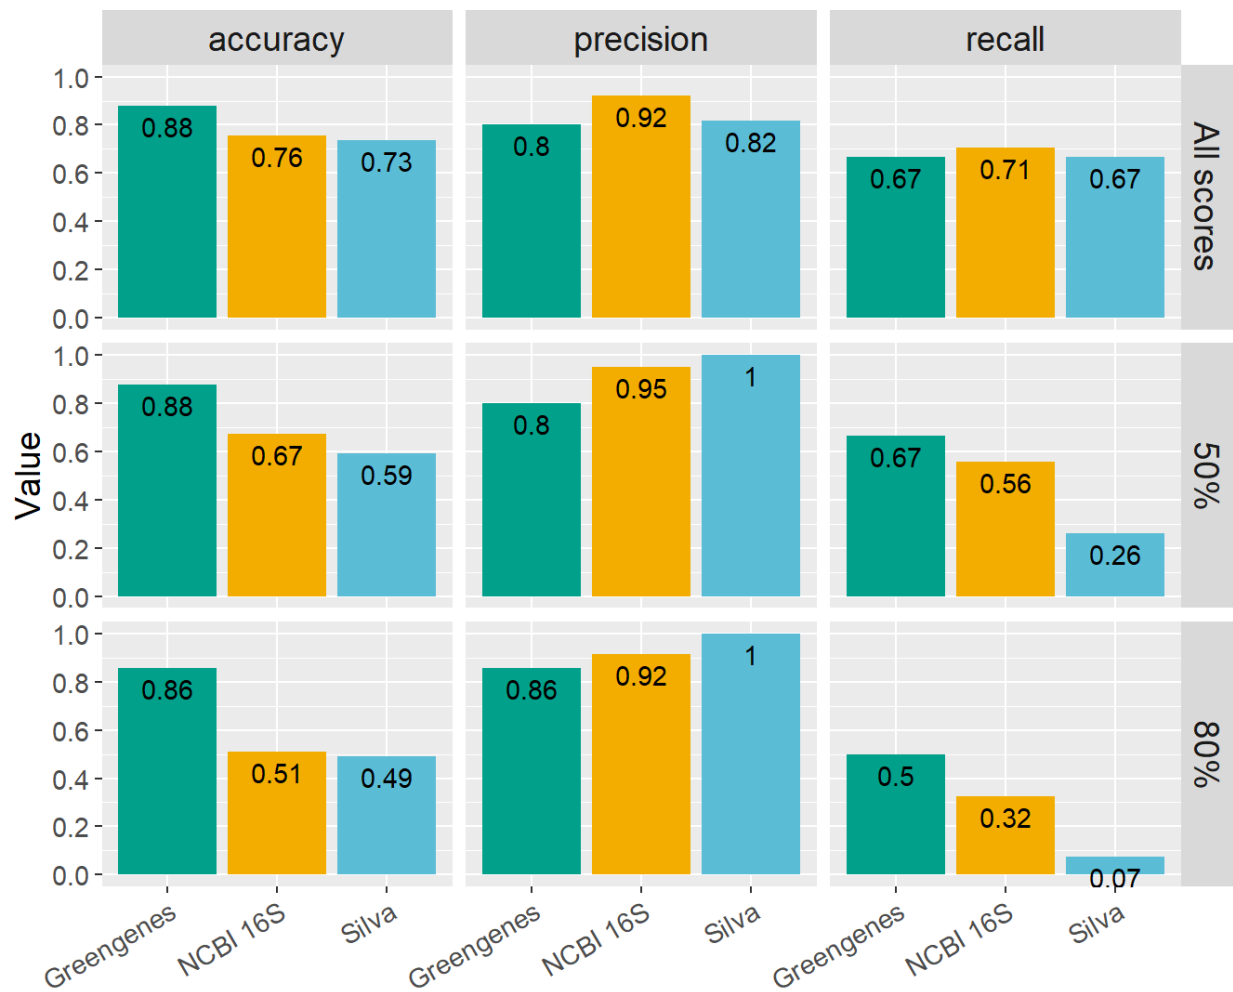

705  
706  
707  
708  
709  
710

**Supplemental Figure 4.** Values for accuracy, precision and recall (columns) when assigning taxonomy with the V4 identifier, Naive Bayes classifier and all databases. Rows are values when ignoring confidence scores, and when using confidence scores of 50% or 80% as thresholds.

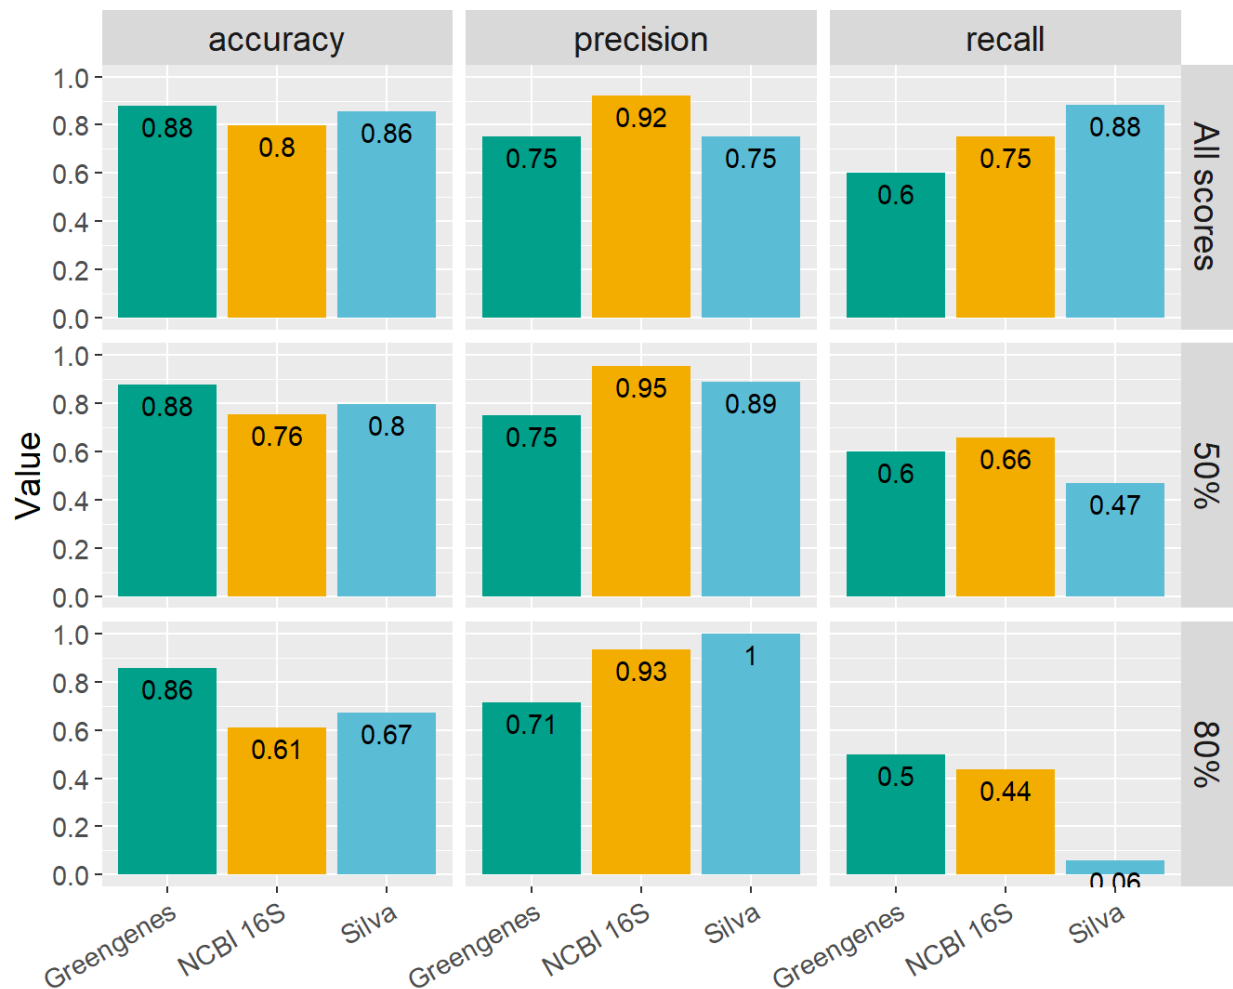

711  
712  
713  
714  
715

**Supplemental Figure 5.** Values for accuracy, precision and recall (columns) when assigning taxonomy with the V4 identifier, BLCA classifier and all databases. Rows are values when ignoring confidence scores, and when using confidence scores of 50% or 80% as thresholds.
